# Supplementary material for: Radial Endobronchial Ultrasound for Lung Cancer Diagnosis: Tips and Tricks
Source: PubMed Central journal article supplement (PMC8899369; doi:10.7150/jca.67113), 2022-01-31
Supplement: jcav13p1307s1.pdf [file jcav13p1307s1.pdf]

## Supplementary material

**A. Contingency analysis.** Each cell contains the observed and expected counts, their difference and the chi-square statistic whose value greater than 3,841 show significant result.

### Contingency Table

C-Arm By location

| Count      | 1       | 2       | Total |
|------------|---------|---------|-------|
| 0          | 115     | 16      | 131   |
| Expected   | 94,0242 | 36,9758 |       |
| Deviation  | 20,9758 | -20,976 |       |
| Cell Chi^2 | 4,6795  | 11,8993 |       |
| 1          | 63      | 54      | 117   |
| Expected   | 83,9758 | 33,0242 |       |
| Deviation  | -20,976 | 20,9758 |       |
| Cell Chi^2 | 5,2394  | 13,3231 |       |
| Total      | 178     | 70      | 248   |

### B. Tests of independence

| Test             | ChiSquare | Prob>ChiSq |
|------------------|-----------|------------|
| Likelihood Ratio | 36,408    | <,0001     |
| Pearson          | 35,141    | <,0001     |

| Fisher's Exact Test | Prob   | Alternative Hypothesis                         |
|---------------------|--------|------------------------------------------------|
| Right               | <,0001 | Prob(location=2) is greater for C-Arm=1 than 0 |
| 2-Tail              | <,0001 | Prob(location=2) is different across C-Arm     |

### C. Relative Risk

| Description   | Relative Risk | Lower 95% | Upper 95% |
|---------------|---------------|-----------|-----------|
| P(1 0)/P(1 1) | 1,630316      | 1,362427  | 1,950879  |
| P(1 1)/P(1 0) | 0,613378      | 0,512589  | 0,733984  |
| P(2 0)/P(2 1) | 0,264631      | 0,160656  | 0,435898  |
| P(2 1)/P(2 0) | 3,778846      | 2,294116  | 6,224481  |

### D. Odds Ratio

| Odds Ratio | Lower 95% | Upper 95% |
|------------|-----------|-----------|
| 6,160714   | 3,258668  | 11,64721  |

**Figure 5.** Statistical report of cross-tabulated location by C-Arm.

**A. Contingency analysis.** Each cell contains the observed and expected counts, their difference and the chi-square statistic whose value greater than 3,841 show significant result.

**Contingency Table**  
Time By location

| Count<br>Expected<br>Deviation<br>Cell Chi^2 | 1                                   | 2                                   | Total |
|----------------------------------------------|-------------------------------------|-------------------------------------|-------|
| 1                                            | 111<br>91,1532<br>19,8468<br>4,3212 | 16<br>35,8468<br>-19,847<br>10,9883 | 127   |
| 2                                            | 37<br>50,2419<br>-13,242<br>3,4901  | 33<br>19,7581<br>13,2419<br>8,8748  | 70    |
| 3                                            | 30<br>36,6048<br>-6,6048<br>1,1918  | 21<br>14,3952<br>6,60484<br>3,0305  | 51    |
| Total                                        | 178                                 | 70                                  | 248   |

**B. Tests of independence**

| Test             | ChiSquare | Prob>ChiSq |
|------------------|-----------|------------|
| Likelihood Ratio | 33,055    | <,0001     |
| Pearson          | 31,897    | <,0001     |

**C. Cochran Armitage Trend Test**

Asymptotic Test

| Z        | Prob<Z | Prob> Z |
|----------|--------|---------|
| -4,72483 | <,0001 | <,0001  |

**Figure 6.** Statistical report of cross-tabulated location by time.

**Table 2.** Step history of the forward selection of independent variables on tumor size: method, cell blocks, slices, tissue, time and C-Arm.

| method | cell blocks | tissue | Time | C-Arm | size      |           |           |           |
|--------|-------------|--------|------|-------|-----------|-----------|-----------|-----------|
|        |             |        |      |       | (Prob[1]) | (Prob[2]) | (Prob[3]) | (Prob[4]) |
| 1      | 0           | 0      | 2    | 1     | 0,3345    | 0,6602    | 0,0054    | 0,0000    |
| 1      | 1           | 0      | 1    | 0     | 0,0000    | 0,0000    | 0,0150    | 0,9849    |
| 1      | 1           | 1      | 1    | 0     | 0,0002    | 0,0653    | 0,9192    | 0,0154    |
| 1      | 1           | 1      | 2    | 1     | 0,0536    | 0,9007    | 0,0456    | 0,0001    |
| 1      | 2           | 0      | 1    | 0     | 0,0000    | 0,0031    | 0,7390    | 0,2579    |
| 1      | 2           | 1      | 1    | 0     | 0,0345    | 0,8950    | 0,0704    | 0,0001    |

|   |   |   |   |   |        |        |        |        |
|---|---|---|---|---|--------|--------|--------|--------|
| 1 | 2 | 1 | 1 | 1 | 0,2429 | 0,7487 | 0,0084 | 0,0000 |
| 1 | 2 | 1 | 2 | 1 | 0,9143 | 0,0855 | 0,0003 | 0,0000 |
| 1 | 3 | 1 | 1 | 0 | 0,0002 | 0,0653 | 0,9192 | 0,0154 |
| 2 | 0 | 0 | 1 | 0 | 0,0017 | 0,3816 | 0,6150 | 0,0018 |
| 2 | 0 | 0 | 2 | 0 | 0,0531 | 0,9008 | 0,0461 | 0,0001 |
| 2 | 0 | 0 | 2 | 1 | 0,3345 | 0,6602 | 0,0054 | 0,0000 |
| 2 | 1 | 1 | 1 | 0 | 0,0002 | 0,0653 | 0,9192 | 0,0154 |
| 2 | 1 | 1 | 2 | 0 | 0,0063 | 0,6933 | 0,2999 | 0,0005 |
| 2 | 1 | 1 | 2 | 1 | 0,0536 | 0,9007 | 0,0456 | 0,0001 |
| 2 | 1 | 1 | 3 | 1 | 0,4449 | 0,5517 | 0,0034 | 0,0000 |
| 2 | 2 | 1 | 1 | 0 | 0,0345 | 0,8950 | 0,0704 | 0,0001 |
| 2 | 2 | 1 | 1 | 1 | 0,2429 | 0,7487 | 0,0084 | 0,0000 |
| 2 | 2 | 1 | 2 | 1 | 0,9143 | 0,0855 | 0,0003 | 0,0000 |
| 2 | 2 | 1 | 3 | 1 | 0,9934 | 0,0066 | 0,0000 | 0,0000 |
| 2 | 3 | 1 | 1 | 0 | 0,0002 | 0,0653 | 0,9192 | 0,0154 |
| 3 | 1 | 1 | 2 | 1 | 0,0160 | 0,8413 | 0,1424 | 0,0002 |
| 3 | 1 | 1 | 3 | 1 | 0,1874 | 0,8010 | 0,0116 | 0,0000 |
| 3 | 2 | 1 | 2 | 1 | 0,7543 | 0,2448 | 0,0009 | 0,0000 |
| 4 | 0 | 0 | 2 | 1 | 0,6359 | 0,3626 | 0,0015 | 0,0000 |
| 4 | 0 | 0 | 3 | 1 | 0,9611 | 0,0388 | 0,0001 | 0,0000 |
| 4 | 0 | 1 | 2 | 1 | 0,9999 | 0,0001 | 0,0000 | 0,0000 |
| 4 | 0 | 1 | 3 | 1 | 1,0000 | 0,0000 | 0,0000 | 0,0000 |
| 4 | 1 | 0 | 3 | 1 | 0,0007 | 0,1961 | 0,7988 | 0,0044 |
| 4 | 1 | 1 | 2 | 1 | 0,1645 | 0,8219 | 0,0136 | 0,0000 |
| 4 | 1 | 1 | 3 | 1 | 0,7358 | 0,2632 | 0,0010 | 0,0000 |

**Effect Summary**

| Source               | LogWorth | PValue  |
|----------------------|----------|---------|
| cell blocks(0&2-1&3) | 42,870   | 0,00000 |
| tissue               | 19,269   | 0,00000 |
| Time(3&2-1)          | 11,798   | 0,00000 |
| Time(3-2)            | 4,087    | 0,00008 |
| cell blocks(0-2)     | 3,023    | 0,00095 |
| C-Arm                | 2,913    | 0,00122 |
| method(4-3)          | 2,413    | 0,00387 |

**Whole Model Test**

| Model      | -LogLikelihood | DF | ChiSquare | Prob>ChiSq |
|------------|----------------|----|-----------|------------|
| Difference | 228,18184      | 7  | 456,3637  | <,0001     |
| Full       | 85,50063       |    |           |            |
| Reduced    | 313,68247      |    |           |            |

**Fit Details**

|                        |        |
|------------------------|--------|
| RSquare (U)            | 0,7274 |
| AICc                   | 191,93 |
| BIC                    | 226,13 |
| Misclassification Rate | 0,072  |

**Parameter Estimates**

| Term                 | Estimate | Std Error | ChiSquare | Prob>ChiSq | Lower 95% | Upper 95% | Odds Ratio |
|----------------------|----------|-----------|-----------|------------|-----------|-----------|------------|
| Size 1]              | -5,287   | 0,593     | 79,43     | <,0001     | .         | .         |            |
| Size 2]              | 0,623    | 0,512     | 1,48      | 0,2237     | .         | .         |            |
| Size 3]              | 7,441    | 0,963     | 59,76     | <,0001     | .         | .         |            |
| cell blocks(0&2-1&3) | 3,940    | 0,475     | 68,91     | <,0001     | 3,033     | 5,159     | 51,42      |
| cell blocks(0-2)     | 2,643    | 0,798     | 10,97     | 0,0009     | 0,970     | 4,764     | 14,05      |
| tissue 0]            | -4,170   | 0,760     | 30,07     | <,0001     | -6,264    | -2,705    | 0,015      |
| Time(3&2-1)          | 2,414    | 0,372     | 42,09     | <,0001     | 1,707     | 3,192     | 11,18      |
| Time(3-2)            | 1,325    | 0,349     | 14,39     | 0,0001     | 0,656     | 2,060     | 3,76       |
| C-Arm 0]             | -1,097   | 0,369     | 8,83      | 0,0030     | -1,906    | -0,417    | 0,33       |
| method(4-3)          | 1,246    | 0,437     | 8,11      | 0,0044     | 0,398     | 2,127     | 3,48       |

**Confusion Matrix**

| Actual size (cm) | Predicted Count |    |    |    |
|------------------|-----------------|----|----|----|
|                  | 1               | 2  | 3  | 4  |
| 1                | 58              | 6  | 4  | 0  |
| 2                | 1               | 93 | 2  | 0  |
| 3                | 0               | 4  | 62 | 0  |
| 4                | 0               | 0  | 1  | 17 |

**Figure 7.** Statistical output of the ordinal logistic regression of tumor size against the variables entered in the model by the forward selection (LogWorth=-logp value).

**Table 3.** Mean probability values of tumor size according to the combined effects of the independent variables.

Some individual patterns with probability values of occurrence higher that 0.800 are distinct from the table:

Size 1 occurs in high proportions in the variable combination:

| cell<br>blocks | tissue | Time | C-Arm |
|----------------|--------|------|-------|
| 2              | 1      | 2(3) | 1     |

and also in the pattern:

| method | cell<br>blocks | C-Arm |
|--------|----------------|-------|
| 4      | 0              | 1     |

Size 2 is associated with:

| cell<br>blocks | tissue | Time | C-Arm |
|----------------|--------|------|-------|
| 2              | 1      | 1    | 0(1)  |

and also

| cell<br>blocks | tissue | Time | C-Arm |
|----------------|--------|------|-------|
| 1              | 1      | 2(3) | 1     |

Size 3 is found in the coded values:

| cell<br>blocks | tissue | Time | C-Arm |
|----------------|--------|------|-------|
|----------------|--------|------|-------|

|      |   |   |   |
|------|---|---|---|
| 3(1) | 1 | 1 | 0 |
|------|---|---|---|

Size 4 is practically indicative in a single combined format:

|        | cell   |        |      |       |
|--------|--------|--------|------|-------|
| method | blocks | tissue | Time | C-Arm |
| 1      | 1      | 0      | 1    | 0     |

Numbers in brackets indicate an alternative occurrence.
